# Supplementary material for: Integrative analyses of potential biomarkers and pathways for non-obstructive azoospermia
Source: Front Genet. 2022 Nov 24;13:988047. doi: 10.3389/fgene.2022.988047 (PMC9730279; doi:10.3389/fgene.2022.988047)
Supplement: Supplementary file 1 [file Table4.XLS]

## Sheet: Sheet1
TF-gene network
Id	Label	Degree	Betweenness
2296	FOXC1	65	4215.86
2624	GATA2	48	2363.97
7528	YY1	40	1592.07
5970	RELA	29	734.44
5468	PPARG	25	682.99
1385	CREB1	25	582.65
4790	NFKB1	24	541.13
2353	FOS	21	718.55
7020	TFAP2A	20	414.87
2300	FOXL1	19	342.56
1869	E2F1	18	297.26
7392	USF2	18	280.15
3725	JUN	17	312.81
133688	UGT3A1	16	594.87
480	ATP1A4	16	519.84
4782	NFIC	16	259.55
5452	POU2F2	15	311.67
6720	SREBF1	15	166.62
3172	HNF4A	14	233.12
4582	MUC1	14	212.14
83959	SLC4A11	13	330.51
9985	REC8	13	261.12
5590	PRKCZ	13	234.99
257101	ZNF683	13	228.43
8448	DOC2A	13	224.09
6722	SRF	13	187.2
30832	ZNF354C	13	150.3
3202	HOXA5	13	136.87
2099	ESR1	13	127.23
254173	TTLL10	12	147.47
56006	SMG9	11	452.94
287015	TRIM42	11	325.4
26261	FBXO24	11	234.62
25981	DNAH1	11	217.44
360203	GLT6D1	11	176.03
6774	STAT3	11	116
3169	FOXA1	11	104.49
860	RUNX2	11	102.47
284418	FAM71E2	10	291.11
23038	WDTC1	10	274.56
85446	ZFHX2	10	185.17
56181	MTFR1L	10	184.81
410	ARSA	10	166.5
148753	FAM163A	10	149.34
3557	IL1RN	10	143.19
51450	PRRX2	10	136.22
1455	CSNK1G2	10	119.45
7157	TP53	10	102.83
5076	PAX2	10	95.81
2002	ELK1	10	95.18
672	BRCA1	10	90.41
1820	ARID3A	10	88.36
671	BPI	9	345.46
3297	HSF1	9	200.72
149095	DCST1	9	194.94
11273	ATXN2L	9	178.77
257236	CCDC96	9	168.88
80125	CCDC33	9	156.32
64118	DUS1L	9	150.86
1843	DUSP1	9	136.53
1558	CYP2C8	9	131.2
8178	ELL	9	122.19
79258	MMEL1	9	118.44
4205	MEF2A	9	110.92
2625	GATA3	9	79.82
4800	NFYA	9	56.78
4149	MAX	9	46.45
10307	APBB3	8	267.07
6643	SNX2	8	172.83
113746	ODF3	8	123.9
286234	SPATA31E1	8	111.01
126123	IZUMO2	8	110.97
79998	ANKRD53	8	110.74
56965	PARP6	8	96.69
140873	C20orf173	8	88.05
7003	TEAD1	8	82.63
4899	NRF1	8	64.45
1876	E2F6	8	60.23
6667	SP1	8	52.08
4929	NR4A2	7	219.42
5024	P2RX3	7	127.59
51298	THEG	7	112.75
89	ACTN3	7	96.34
84444	DOT1L	7	92.69
7022	TFAP2C	7	82.75
339168	TMEM95	7	78.15
164153	UBL4B	7	77.75
57576	KIF17	7	74.71
26038	CHD5	7	73.45
140680	C20ORF96	7	71.66
29990	PILRB	7	62.32
147746	HIPK4	7	50.5
688	KLF5	7	46.01
6721	SREBF2	7	26.5
25988	HINFP	7	25.34
579	NKX3-2	6	197.67
133923	ZNF474	6	172.48
654463	FER1L6	6	135.83
10607	TBL3	6	114.07
26140	TTLL3	6	94.48
93979	CPA5	6	72
3628	INPP1	6	70.25
256957	HEATR9	6	66.76
196477	CCER1	6	65.29
8314	BAP1	6	64.14
81570	CLPB	6	61.39
114827	FHAD1	6	61.27
55191	NADSYN1	6	61.07
93034	NT5C1B	6	58.24
387338	NSUN4	6	56.01
148109	FAM187B	6	55.68
60385	TSKS	6	50.67
1051	CEBPB	6	27.21
3660	IRF2	6	26.75
2295	FOXF2	6	23.71
7391	USF1	6	12.21
406890	MIRLET7G	5	222.33
1360	CPB1	5	65.52
150483	TEKT4	5	59.98
146177	VWA3A	5	59.71
127579	DCST2	5	47.83
2019	EN1	5	43.08
200172	SLFNL1	5	42.59
345895	RSPH4A	5	41.26
10291	SF3A1	5	31.67
26716	OR2H1	5	29.73
164592	CCDC116	5	24.65
2908	NR3C1	5	23.17
6772	STAT1	5	19.46
8626	TP63	5	14.93
23302	WSCD1	4	71.83
84812	PLCD4	4	35.74
406977	MIR199A2	4	33.16
10900	RUNDC3A	4	30.2
246329	STAC3	4	28.69
639	PRDM1	4	27.46
84203	TXNDC2	4	25.77
259296	TAS2R50	4	20.51
284274	SMIM21	4	19.65
79575	ABHD8	4	17.03
389123	IQCF2	4	17.02
6900	CNTN2	4	15.61
161753	ODF3L1	4	14.25
3727	JUND	4	12.12
2005	ELK4	4	10.36
1958	EGR1	4	5.59
60439	TTTY2	3	19.98
574506	MIR503	3	18.06
56664	VTRNA1-1	3	16.01
406882	MIRLET7A2	3	16.01
407055	MIR99A	3	14.9
164380	CST13P	3	13.8
414236	C10ORF55	3	11.75
148066	ZNRF4	3	11.27
5630	PRPH	3	10.82
3651	PDX1	3	9.79
7025	NR2F1	3	5.09
6660	SOX5	3	4.49
406888	MIRLET7F1	2	180
405	ARNT	2	10.59
195977	ANTXRL	2	5.56
378807	CATSPER4	2	5.39
407034	MIR30E	2	4.81
285641	SLC36A3	2	2.09
1482	NKX2-5	2	1.88
6663	SOX10	2	1.28
861	RUNX1	2	0.88
407019	MIR27B	1	0
2844	GPR21	1	0
407036	MIR32	1	0
255330	NUP210P1	1	0
90342	FER1L5	1	0
2297	FOXD1	1	0
4824	NKX3-1	1	0
6689	SPIB	1	0
135935	NOBOX	1	0
4773	NFATC2	1	0
7182	NR2C2	1	0
4609	MYC	1	0
10002	NR2E3	1	0
4602	MYB	1	0
2001	ELF5	1	0
