# Supplementary material for: Integrative analyses of potential biomarkers and pathways for non-obstructive azoospermia
Source: Front Genet. 2022 Nov 24;13:988047. doi: 10.3389/fgene.2022.988047 (PMC9730279; doi:10.3389/fgene.2022.988047)
Supplement: Supplementary file 3 [file Table3.XLS]

## Sheet: Sheet1
miRNA-gene network
Id	Label	Degree	Betweenness
81570	CLPB	130	137564
10291	SF3A1	80	65799.2
2353	FOS	58	46165.9
23038	WDTC1	54	34230.5
6643	SNX2	52	43726.2
56181	MTFR1L	50	34891.5
84444	DOT1L	46	30511.1
387338	NSUN4	43	24308
410	ARSA	40	27605.8
10607	TBL3	37	22390.3
8314	BAP1	33	21070.5
1843	DUSP1	30	18750.2
414236	C10orf55	29	18125.1
8178	ELL	29	17321.2
140680	C20orf96	28	17065.7
11273	ATXN2L	24	18125.4
148753	FAM163A	24	17193.8
1455	CSNK1G2	24	15082.3
93034	NT5C1B	19	11572.7
MIMAT0000765	hsa-mir-335-5p	16	25059.9
4929	NR4A2	16	10548.1
378807	CATSPER4	16	6839.67
26038	CHD5	15	9557.49
5024	P2RX3	14	10218
55191	NADSYN1	13	6711.14
133688	UGT3A1	12	7350.7
284274	SMIM21	11	4779.07
23302	WSCD1	11	4742
10307	APBB3	10	4505.98
85446	ZFHX2	10	3965.56
4582	MUC1	9	5686.26
2844	GPR21	9	3095.16
287015	TRIM42	8	4106.95
MIMAT0000062	hsa-let-7a-5p	6	23119
MIMAT0027634	hsa-mir-6867-5p	6	18083.1
MIMAT0000083	hsa-mir-26b-5p	6	4581.14
79998	ANKRD53	6	3950
345895	RSPH4A	6	3130.46
MIMAT0027457	hsa-mir-6778-3p	5	19483.5
MIMAT0004795	hsa-mir-574-5p	5	14387.6
MIMAT0000422	hsa-mir-124-3p	5	4131.72
MIMAT0004570	hsa-mir-223-5p	5	2982.19
MIMAT0002175	hsa-mir-485-5p	4	9381.87
MIMAT0000617	hsa-mir-200c-3p	4	7619.16
MIMAT0004609	hsa-mir-149-3p	4	6910.95
MIMAT0019849	hsa-mir-4728-5p	4	6910.95
MIMAT0027470	hsa-mir-6785-5p	4	6910.95
MIMAT0027666	hsa-mir-6883-5p	4	6910.95
MIMAT0000242	hsa-mir-129-5p	4	6238.05
MIMAT0000255	hsa-mir-34a-5p	4	4706.71
MIMAT0027494	hsa-mir-6797-5p	4	3648.83
MIMAT0032029	hsa-mir-1249-5p	4	3648.83
MIMAT0005952	hsa-mir-1321	4	2398.85
MIMAT0019868	hsa-mir-4739	4	2398.85
MIMAT0019899	hsa-mir-4756-5p	4	2398.85
1558	CYP2C8	4	1606.77
29990	PILRB	4	1064.05
MIMAT0026606	hsa-mir-511-3p	4	492.54
MIMAT0003324	hsa-mir-661	3	12817.8
MIMAT0004945	hsa-mir-744-5p	3	5522.77
MIMAT0027475	hsa-mir-6787-3p	3	5460.12
MIMAT0027599	hsa-mir-6849-3p	3	4707.38
MIMAT0004490	hsa-mir-19a-5p	3	4655.89
MIMAT0004491	hsa-mir-19b-1-5p	3	4655.89
MIMAT0004492	hsa-mir-19b-2-5p	3	4655.89
MIMAT0003294	hsa-mir-625-5p	3	4650.85
MIMAT0030982	hsa-mir-8055	3	4376.95
MIMAT0018206	hsa-mir-3929	3	4201.3
MIMAT0019006	hsa-mir-4478	3	4201.3
MIMAT0019034	hsa-mir-4419b	3	4201.3
MIMAT0027668	hsa-mir-6884-5p	3	4201.3
MIMAT0028230	hsa-mir-7160-5p	3	4201.3
MIMAT0000069	hsa-mir-16-5p	3	4133.09
MIMAT0004983	hsa-mir-940	3	3492.47
MIMAT0000101	hsa-mir-103a-3p	3	3199.67
MIMAT0000086	hsa-mir-29a-3p	3	3162.17
MIMAT0002819	hsa-mir-193b-3p	3	3153.55
MIMAT0004598	hsa-mir-141-5p	3	2667.8
MIMAT0000256	hsa-mir-181a-5p	3	2641.05
MIMAT0028120	hsa-mir-7111-3p	3	2378.69
MIMAT0000451	hsa-mir-150-5p	3	1858.62
MIMAT0004612	hsa-mir-186-3p	3	1858.62
MIMAT0000067	hsa-let-7f-5p	3	1826.92
MIMAT0000104	hsa-mir-107	3	1605.73
MIMAT0000064	hsa-let-7c-5p	3	1521.75
64118	DUS1L	3	879.1
140873	C20orf173	3	855.6
MIMAT0003231	hsa-mir-567	3	262.57
MIMAT0004450	hsa-mir-297	3	262.57
MIMAT0002824	hsa-mir-498	2	4975.26
MIMAT0001075	hsa-mir-384	2	3726.22
MIMAT0018113	hsa-mir-3685	2	3726.22
MIMAT0019200	hsa-mir-3124-3p	2	3726.22
MIMAT0004513	hsa-mir-101-5p	2	3178.84
MIMAT0015378	hsa-mir-3065-3p	2	3178.84
MIMAT0022948	hsa-mir-1292-3p	2	3178.84
MIMAT0000318	hsa-mir-200b-3p	2	2997.78
MIMAT0001536	hsa-mir-429	2	2997.78
MIMAT0026555	hsa-mir-329-5p	2	2896.41
MIMAT0028109	hsa-mir-7106-5p	2	2807.13
MIMAT0004509	hsa-mir-93-3p	2	2634.92
MIMAT0003283	hsa-mir-615-3p	2	2632.04
MIMAT0015037	hsa-mir-3163	2	2439.75
MIMAT0030431	hsa-mir-7856-5p	2	1998.21
MIMAT0019837	hsa-mir-4722-3p	2	1947.33
MIMAT0027356	hsa-mir-6727-3p	2	1947.33
MIMAT0027395	hsa-mir-6747-3p	2	1947.33
MIMAT0026623	hsa-mir-627-3p	2	1944.79
MIMAT0000761	hsa-mir-324-5p	2	1944.5
MIMAT0022939	hsa-mir-939-3p	2	1911.76
MIMAT0003888	hsa-mir-766-3p	2	1844.35
MIMAT0004778	hsa-mir-508-5p	2	1844.35
MIMAT0019060	hsa-mir-4522	2	1844.35
MIMAT0022491	hsa-mir-5698	2	1844.35
MIMAT0010497	hsa-mir-759	2	1773.67
MIMAT0032110	hsa-mir-3653-5p	2	1773.67
MIMAT0000646	hsa-mir-155-5p	2	1761.13
MIMAT0019891	hsa-mir-4753-3p	2	1599.77
MIMAT0020603	hsa-mir-5096	2	1599.77
MIMAT0000087	hsa-mir-30a-5p	2	1490.77
MIMAT0000100	hsa-mir-29b-3p	2	1413.91
MIMAT0000681	hsa-mir-29c-3p	2	1413.91
MIMAT0003285	hsa-mir-548c-3p	2	1378.31
MIMAT0027671	hsa-mir-6885-3p	2	1350.14
MIMAT0000763	hsa-mir-338-3p	2	1269.59
MIMAT0019069	hsa-mir-4530	2	1269.59
MIMAT0022287	hsa-mir-5586-5p	2	1269.59
MIMAT0004950	hsa-mir-877-3p	2	1261.23
MIMAT0004284	hsa-mir-675-5p	2	1246.72
MIMAT0018993	hsa-mir-4466	2	1246.72
MIMAT0015030	hsa-mir-3156-5p	2	1229.39
MIMAT0018179	hsa-mir-3907	2	1194.06
MIMAT0002822	hsa-mir-512-5p	2	1164.57
MIMAT0022482	hsa-mir-5690	2	1164.57
MIMAT0027402	hsa-mir-6751-5p	2	1164.57
MIMAT0027412	hsa-mir-6756-5p	2	1164.57
MIMAT0027432	hsa-mir-6766-5p	2	1164.57
MIMAT0027506	hsa-mir-6803-5p	2	1164.57
MIMAT0004946	hsa-mir-744-3p	2	1143.56
MIMAT0022268	hsa-mir-548as-3p	2	1143.56
MIMAT0015058	hsa-mir-3180-3p	2	1094.8
MIMAT0015080	hsa-mir-3196	2	1094.8
MIMAT0018178	hsa-mir-3180	2	1094.8
MIMAT0018994	hsa-mir-4467	2	1094.8
MIMAT0027532	hsa-mir-6816-5p	2	1094.8
MIMAT0000099	hsa-mir-101-3p	2	1071.05
MIMAT0000449	hsa-mir-146a-5p	2	1071.05
MIMAT0018956	hsa-mir-4438	2	930.52
MIMAT0020600	hsa-mir-5095	2	930.52
MIMAT0023702	hsa-mir-6077	2	930.52
MIMAT0025465	hsa-mir-6504-3p	2	930.52
MIMAT0028213	hsa-mir-7151-3p	2	930.52
MIMAT0005589	hsa-mir-1234-3p	2	907.94
MIMAT0028111	hsa-mir-7107-5p	2	907.94
MIMAT0025481	hsa-mir-6512-3p	2	864.82
MIMAT0027345	hsa-mir-6720-5p	2	864.82
MIMAT0021028	hsa-mir-5004-3p	2	857.63
MIMAT0027420	hsa-mir-6760-5p	2	844.41
MIMAT0027436	hsa-mir-6768-5p	2	815.36
MIMAT0000092	hsa-mir-92a-3p	2	812.98
MIMAT0022484	hsa-mir-5692a	2	812.98
MIMAT0002858	hsa-mir-520g-3p	2	810.16
MIMAT0002867	hsa-mir-520h	2	810.16
MIMAT0005459	hsa-mir-1224-3p	2	810.16
56965	PARP6	2	792
5590	PRKCZ	2	792
MIMAT0027363	hsa-mir-6731-5p	2	737.75
MIMAT0031012	hsa-mir-8085	2	737.75
MIMAT0000462	hsa-mir-206	2	704.41
MIMAT0000421	hsa-mir-122-5p	2	688.95
MIMAT0000425	hsa-mir-130a-3p	2	688.95
MIMAT0000688	hsa-mir-301a-3p	2	688.95
MIMAT0000691	hsa-mir-130b-3p	2	688.95
MIMAT0003885	hsa-mir-454-3p	2	688.95
MIMAT0004517	hsa-mir-106a-3p	2	688.95
MIMAT0004958	hsa-mir-301b-3p	2	688.95
MIMAT0016844	hsa-mir-4295	2	688.95
MIMAT0018072	hsa-mir-3652	2	688.95
MIMAT0018088	hsa-mir-3666	2	688.95
MIMAT0018945	hsa-mir-4430	2	688.95
MIMAT0018985	hsa-mir-3135b	2	688.95
MIMAT0026612	hsa-mir-504-3p	2	688.95
MIMAT0027550	hsa-mir-6825-5p	2	667.86
MIMAT0000416	hsa-mir-1-3p	2	628.15
MIMAT0022941	hsa-mir-1227-5p	2	619.52
MIMAT0026477	hsa-mir-128-1-5p	2	619.52
MIMAT0027424	hsa-mir-6762-5p	2	619.52
MIMAT0027590	hsa-mir-6845-5p	2	619.52
MIMAT0031095	hsa-mir-128-2-5p	2	619.52
MIMAT0016901	hsa-mir-4271	2	565.2
MIMAT0019844	hsa-mir-4725-3p	2	565.2
MIMAT0027572	hsa-mir-6780b-5p	2	565.2
MIMAT0027503	hsa-mir-6801-3p	2	558.93
MIMAT0027521	hsa-mir-6810-3p	2	558.93
MIMAT0026640	hsa-mir-670-3p	2	530.83
MIMAT0015063	hsa-mir-3183	2	526.25
MIMAT0019839	hsa-mir-4723-3p	2	526.25
MIMAT0021124	hsa-mir-5193	2	526.25
MIMAT0027621	hsa-mir-6769b-3p	2	526.25
MIMAT0028118	hsa-mir-7110-3p	2	526.25
MIMAT0019744	hsa-mir-4667-3p	2	457.98
MIMAT0027675	hsa-mir-6887-3p	2	457.98
MIMAT0004952	hsa-mir-665	2	452.61
MIMAT0006767	hsa-mir-1827	2	452.61
MIMAT0019712	hsa-mir-4649-3p	2	452.61
MIMAT0019836	hsa-mir-4722-5p	2	452.61
MIMAT0019921	hsa-mir-4768-3p	2	452.61
MIMAT0027516	hsa-mir-6808-5p	2	452.61
MIMAT0027686	hsa-mir-6893-5p	2	452.61
MIMAT0018961	hsa-mir-4443	2	431.34
MIMAT0025486	hsa-mir-6515-5p	2	431.34
MIMAT0004543	hsa-mir-192-3p	2	417.66
MIMAT0000252	hsa-mir-7-5p	2	356.91
MIMAT0005871	hsa-mir-1207-5p	2	325.77
MIMAT0019862	hsa-mir-4736	2	325.77
MIMAT0019913	hsa-mir-4763-3p	2	325.77
MIMAT0028211	hsa-mir-7150	2	325.77
MIMAT0001629	hsa-mir-329-3p	2	315.91
MIMAT0003271	hsa-mir-603	2	315.91
MIMAT0004683	hsa-mir-362-3p	2	315.91
MIMAT0018357	hsa-mir-3941	2	315.91
MIMAT0033692	hsa-mir-8485	2	315.91
MIMAT0000257	hsa-mir-181b-5p	2	312.06
MIMAT0000448	hsa-mir-136-5p	2	254.95
MIMAT0000063	hsa-let-7b-5p	2	245.16
MIMAT0000066	hsa-let-7e-5p	2	245.16
MIMAT0018931	hsa-mir-4419a	2	89.96
MIMAT0019047	hsa-mir-4510	2	89.96
MIMAT0024610	hsa-mir-6127	2	89.96
MIMAT0024613	hsa-mir-6129	2	89.96
MIMAT0024614	hsa-mir-6130	2	89.96
MIMAT0024617	hsa-mir-6133	2	89.96
3297	HSF1	2	82.58
26261	FBXO24	1	0
149095	DCST1	1	0
5630	PRPH	1	0
26140	TTLL3	1	0
57576	KIF17	1	0
79258	MMEL1	1	0
127579	DCST2	1	0
133923	ZNF474	1	0
150483	TEKT4	1	0
161753	ODF3L1	1	0
196477	CCER1	1	0
256957	HEATR9	1	0
MIMAT0000065	hsa-let-7d-5p	1	0
MIMAT0000068	hsa-mir-15a-5p	1	0
MIMAT0000073	hsa-mir-19a-3p	1	0
MIMAT0000076	hsa-mir-21-5p	1	0
MIMAT0000080	hsa-mir-24-3p	1	0
MIMAT0000084	hsa-mir-27a-3p	1	0
MIMAT0000089	hsa-mir-31-5p	1	0
MIMAT0000091	hsa-mir-33a-5p	1	0
MIMAT0000096	hsa-mir-98-5p	1	0
MIMAT0000222	hsa-mir-192-5p	1	0
MIMAT0000243	hsa-mir-148a-3p	1	0
MIMAT0000244	hsa-mir-30c-5p	1	0
MIMAT0000250	hsa-mir-139-5p	1	0
MIMAT0000260	hsa-mir-182-3p	1	0
MIMAT0000265	hsa-mir-204-5p	1	0
MIMAT0000268	hsa-mir-211-5p	1	0
MIMAT0000272	hsa-mir-215-5p	1	0
MIMAT0000274	hsa-mir-217	1	0
MIMAT0000275	hsa-mir-218-5p	1	0
MIMAT0000278	hsa-mir-221-3p	1	0
MIMAT0000279	hsa-mir-222-3p	1	0
MIMAT0000414	hsa-let-7g-5p	1	0
MIMAT0000415	hsa-let-7i-5p	1	0
MIMAT0000417	hsa-mir-15b-5p	1	0
MIMAT0000419	hsa-mir-27b-3p	1	0
MIMAT0000423	hsa-mir-125b-5p	1	0
MIMAT0000424	hsa-mir-128-3p	1	0
MIMAT0000427	hsa-mir-133a-3p	1	0
MIMAT0000432	hsa-mir-141-3p	1	0
MIMAT0000435	hsa-mir-143-3p	1	0
MIMAT0000437	hsa-mir-145-5p	1	0
MIMAT0000455	hsa-mir-185-5p	1	0
MIMAT0000459	hsa-mir-193a-3p	1	0
MIMAT0000461	hsa-mir-195-5p	1	0
MIMAT0000682	hsa-mir-200a-3p	1	0
MIMAT0000718	hsa-mir-302d-3p	1	0
MIMAT0000722	hsa-mir-370-3p	1	0
MIMAT0000724	hsa-mir-372-3p	1	0
MIMAT0000725	hsa-mir-373-5p	1	0
MIMAT0000728	hsa-mir-375	1	0
MIMAT0000730	hsa-mir-377-3p	1	0
MIMAT0000731	hsa-mir-378a-5p	1	0
MIMAT0000735	hsa-mir-380-3p	1	0
MIMAT0000753	hsa-mir-342-3p	1	0
MIMAT0000756	hsa-mir-326	1	0
MIMAT0000762	hsa-mir-324-3p	1	0
MIMAT0001080	hsa-mir-196b-5p	1	0
MIMAT0001341	hsa-mir-424-5p	1	0
MIMAT0001541	hsa-mir-449a	1	0
MIMAT0001545	hsa-mir-450a-5p	1	0
MIMAT0001625	hsa-mir-431-5p	1	0
MIMAT0001635	hsa-mir-452-5p	1	0
MIMAT0001636	hsa-mir-452-3p	1	0
MIMAT0001638	hsa-mir-409-5p	1	0
MIMAT0002170	hsa-mir-412-3p	1	0
MIMAT0002171	hsa-mir-410-3p	1	0
MIMAT0002811	hsa-mir-202-3p	1	0
MIMAT0002813	hsa-mir-493-5p	1	0
MIMAT0002814	hsa-mir-432-5p	1	0
MIMAT0002820	hsa-mir-497-5p	1	0
MIMAT0002821	hsa-mir-181d-5p	1	0
MIMAT0002833	hsa-mir-520a-5p	1	0
MIMAT0002838	hsa-mir-525-5p	1	0
MIMAT0002849	hsa-mir-524-5p	1	0
MIMAT0002855	hsa-mir-520d-5p	1	0
MIMAT0002873	hsa-mir-502-5p	1	0
MIMAT0002879	hsa-mir-507	1	0
MIMAT0002882	hsa-mir-510-5p	1	0
MIMAT0002890	hsa-mir-299-5p	1	0
MIMAT0002891	hsa-mir-18a-3p	1	0
MIMAT0003150	hsa-mir-455-5p	1	0
MIMAT0003221	hsa-mir-557	1	0
MIMAT0003228	hsa-mir-564	1	0
MIMAT0003230	hsa-mir-566	1	0
MIMAT0003234	hsa-mir-569	1	0
MIMAT0003236	hsa-mir-571	1	0
MIMAT0003242	hsa-mir-577	1	0
MIMAT0003250	hsa-mir-585-3p	1	0
MIMAT0003252	hsa-mir-586	1	0
MIMAT0003256	hsa-mir-589-3p	1	0
MIMAT0003263	hsa-mir-595	1	0
MIMAT0003270	hsa-mir-602	1	0
MIMAT0003279	hsa-mir-611	1	0
MIMAT0003281	hsa-mir-613	1	0
MIMAT0003284	hsa-mir-616-5p	1	0
MIMAT0003292	hsa-mir-623	1	0
MIMAT0003296	hsa-mir-627-5p	1	0
MIMAT0003301	hsa-mir-33b-5p	1	0
MIMAT0003310	hsa-mir-640	1	0
MIMAT0003319	hsa-mir-649	1	0
MIMAT0003321	hsa-mir-651-5p	1	0
MIMAT0003322	hsa-mir-652-3p	1	0
MIMAT0003330	hsa-mir-654-5p	1	0
MIMAT0003336	hsa-mir-658	1	0
MIMAT0003337	hsa-mir-659-3p	1	0
MIMAT0003339	hsa-mir-421	1	0
MIMAT0003385	hsa-mir-363-5p	1	0
MIMAT0003882	hsa-mir-767-5p	1	0
MIMAT0003886	hsa-mir-769-5p	1	0
MIMAT0003887	hsa-mir-769-3p	1	0
MIMAT0003948	hsa-mir-770-5p	1	0
MIMAT0004488	hsa-mir-15a-3p	1	0
MIMAT0004495	hsa-mir-22-5p	1	0
MIMAT0004498	hsa-mir-25-5p	1	0
MIMAT0004501	hsa-mir-27a-5p	1	0
MIMAT0004505	hsa-mir-32-3p	1	0
MIMAT0004508	hsa-mir-92a-2-5p	1	0
MIMAT0004550	hsa-mir-30c-2-3p	1	0
MIMAT0004553	hsa-mir-7-1-3p	1	0
MIMAT0004554	hsa-mir-7-2-3p	1	0
MIMAT0004557	hsa-mir-34a-3p	1	0
MIMAT0004561	hsa-mir-187-5p	1	0
MIMAT0004565	hsa-mir-218-1-3p	1	0
MIMAT0004567	hsa-mir-219a-1-3p	1	0
MIMAT0004568	hsa-mir-221-5p	1	0
MIMAT0004602	hsa-mir-125a-3p	1	0
MIMAT0004607	hsa-mir-138-1-3p	1	0
MIMAT0004611	hsa-mir-185-3p	1	0
MIMAT0004613	hsa-mir-188-3p	1	0
MIMAT0004658	hsa-mir-155-3p	1	0
MIMAT0004674	hsa-mir-30c-1-3p	1	0
MIMAT0004675	hsa-mir-219a-2-3p	1	0
MIMAT0004676	hsa-mir-34b-3p	1	0
MIMAT0004680	hsa-mir-130b-5p	1	0
MIMAT0004686	hsa-mir-367-5p	1	0
MIMAT0004687	hsa-mir-371a-5p	1	0
MIMAT0004692	hsa-mir-340-5p	1	0
MIMAT0004693	hsa-mir-330-5p	1	0
MIMAT0004702	hsa-mir-339-3p	1	0
MIMAT0004748	hsa-mir-423-5p	1	0
MIMAT0004764	hsa-mir-490-5p	1	0
MIMAT0004766	hsa-mir-146b-3p	1	0
MIMAT0004768	hsa-mir-497-3p	1	0
MIMAT0004777	hsa-mir-513a-3p	1	0
MIMAT0004784	hsa-mir-455-3p	1	0
MIMAT0004800	hsa-mir-550a-5p	1	0
MIMAT0004814	hsa-mir-654-3p	1	0
MIMAT0004901	hsa-mir-298	1	0
MIMAT0004907	hsa-mir-892a	1	0
MIMAT0004909	hsa-mir-450b-5p	1	0
MIMAT0004911	hsa-mir-874-3p	1	0
MIMAT0004912	hsa-mir-890	1	0
MIMAT0004918	hsa-mir-892b	1	0
MIMAT0004919	hsa-mir-541-5p	1	0
MIMAT0004920	hsa-mir-541-3p	1	0
MIMAT0004947	hsa-mir-885-5p	1	0
MIMAT0004953	hsa-mir-873-5p	1	0
MIMAT0004954	hsa-mir-543	1	0
MIMAT0004957	hsa-mir-760	1	0
MIMAT0004974	hsa-mir-924	1	0
MIMAT0004976	hsa-mir-933	1	0
MIMAT0004977	hsa-mir-934	1	0
MIMAT0004985	hsa-mir-942-5p	1	0
MIMAT0005577	hsa-mir-1226-3p	1	0
MIMAT0005584	hsa-mir-1229-3p	1	0
MIMAT0005593	hsa-mir-1238-3p	1	0
MIMAT0005788	hsa-mir-513b-5p	1	0
MIMAT0005789	hsa-mir-513c-5p	1	0
MIMAT0005794	hsa-mir-1296-5p	1	0
MIMAT0005797	hsa-mir-1301-3p	1	0
MIMAT0005823	hsa-mir-1178-3p	1	0
MIMAT0005866	hsa-mir-1203	1	0
MIMAT0005873	hsa-mir-1208	1	0
MIMAT0005882	hsa-mir-548k	1	0
MIMAT0005883	hsa-mir-1293	1	0
MIMAT0005897	hsa-mir-1245a	1	0
MIMAT0005907	hsa-mir-1256	1	0
MIMAT0005911	hsa-mir-1260a	1	0
MIMAT0005917	hsa-mir-548m	1	0
MIMAT0005921	hsa-mir-1267	1	0
MIMAT0005922	hsa-mir-1268a	1	0
MIMAT0005929	hsa-mir-1275	1	0
MIMAT0005930	hsa-mir-1276	1	0
MIMAT0005939	hsa-mir-1281	1	0
MIMAT0005948	hsa-mir-664a-5p	1	0
MIMAT0005951	hsa-mir-1307-3p	1	0
MIMAT0006790	hsa-mir-675-3p	1	0
MIMAT0007891	hsa-mir-1915-5p	1	0
MIMAT0007892	hsa-mir-1915-3p	1	0
MIMAT0009196	hsa-mir-103a-2-5p	1	0
MIMAT0009206	hsa-mir-2113	1	0
MIMAT0009447	hsa-mir-1972	1	0
MIMAT0009448	hsa-mir-1973	1	0
MIMAT0009451	hsa-mir-1976	1	0
MIMAT0009977	hsa-mir-2052	1	0
MIMAT0010367	hsa-mir-764	1	0
MIMAT0013518	hsa-mir-2682-3p	1	0
MIMAT0013802	hsa-mir-2861	1	0
MIMAT0014979	hsa-mir-3117-3p	1	0
MIMAT0014983	hsa-mir-3121-3p	1	0
MIMAT0014984	hsa-mir-3122	1	0
MIMAT0014991	hsa-mir-3128	1	0
MIMAT0014994	hsa-mir-3130-3p	1	0
MIMAT0014996	hsa-mir-3131	1	0
MIMAT0015004	hsa-mir-544b	1	0
MIMAT0015008	hsa-mir-3140-3p	1	0
MIMAT0015019	hsa-mir-3147	1	0
MIMAT0015020	hsa-mir-548v	1	0
MIMAT0015026	hsa-mir-3153	1	0
MIMAT0015028	hsa-mir-3154	1	0
MIMAT0015036	hsa-mir-3162-5p	1	0
MIMAT0015039	hsa-mir-3165	1	0
MIMAT0015041	hsa-mir-1260b	1	0
MIMAT0015049	hsa-mir-1193	1	0
MIMAT0015050	hsa-mir-323b-3p	1	0
MIMAT0015051	hsa-mir-3174	1	0
MIMAT0015053	hsa-mir-3176	1	0
MIMAT0015056	hsa-mir-3179	1	0
MIMAT0015064	hsa-mir-3184-5p	1	0
MIMAT0015065	hsa-mir-3185	1	0
MIMAT0015066	hsa-mir-3065-5p	1	0
MIMAT0015069	hsa-mir-3187-3p	1	0
MIMAT0015070	hsa-mir-3188	1	0
MIMAT0015073	hsa-mir-3190-5p	1	0
MIMAT0015079	hsa-mir-3195	1	0
MIMAT0015085	hsa-mir-3200-3p	1	0
MIMAT0015087	hsa-mir-514b-5p	1	0
MIMAT0015089	hsa-mir-3202	1	0
MIMAT0015377	hsa-mir-3126-3p	1	0
MIMAT0016849	hsa-mir-4294	1	0
MIMAT0016857	hsa-mir-4305	1	0
MIMAT0016858	hsa-mir-4306	1	0
MIMAT0016861	hsa-mir-4308	1	0
MIMAT0016862	hsa-mir-4310	1	0
MIMAT0016867	hsa-mir-4316	1	0
MIMAT0016869	hsa-mir-4318	1	0
MIMAT0016871	hsa-mir-4320	1	0
MIMAT0016881	hsa-mir-4260	1	0
MIMAT0016886	hsa-mir-4252	1	0
MIMAT0016889	hsa-mir-4327	1	0
MIMAT0016890	hsa-mir-4261	1	0
MIMAT0016893	hsa-mir-4267	1	0
MIMAT0016900	hsa-mir-4270	1	0
MIMAT0016902	hsa-mir-4272	1	0
MIMAT0016909	hsa-mir-4279	1	0
MIMAT0016914	hsa-mir-4283	1	0
MIMAT0016919	hsa-mir-4292	1	0
MIMAT0017392	hsa-mir-3200-5p	1	0
MIMAT0017950	hsa-mir-2355-3p	1	0
MIMAT0017991	hsa-mir-3613-3p	1	0
MIMAT0017998	hsa-mir-3618	1	0
MIMAT0018004	hsa-mir-3622a-3p	1	0
MIMAT0018005	hsa-mir-3622b-5p	1	0
MIMAT0018006	hsa-mir-3622b-3p	1	0
MIMAT0018068	hsa-mir-3648	1	0
MIMAT0018078	hsa-mir-3658	1	0
MIMAT0018079	hsa-mir-1273e	1	0
MIMAT0018085	hsa-mir-3663-3p	1	0
MIMAT0018086	hsa-mir-3664-5p	1	0
MIMAT0018090	hsa-mir-3667-3p	1	0
MIMAT0018095	hsa-mir-3672	1	0
MIMAT0018098	hsa-mir-3675-5p	1	0
MIMAT0018099	hsa-mir-3675-3p	1	0
MIMAT0018107	hsa-mir-3680-3p	1	0
MIMAT0018109	hsa-mir-3681-3p	1	0
MIMAT0018165	hsa-mir-3714	1	0
MIMAT0018187	hsa-mir-3913-5p	1	0
MIMAT0018194	hsa-mir-3150b-3p	1	0
MIMAT0018197	hsa-mir-3922-3p	1	0
MIMAT0018349	hsa-mir-3934-5p	1	0
MIMAT0018447	hsa-mir-548aa	1	0
MIMAT0018925	hsa-mir-1268b	1	0
MIMAT0018929	hsa-mir-4417	1	0
MIMAT0018937	hsa-mir-378g	1	0
MIMAT0018940	hsa-mir-4425	1	0
MIMAT0018948	hsa-mir-4432	1	0
MIMAT0018949	hsa-mir-4433a-3p	1	0
MIMAT0018953	hsa-mir-4437	1	0
MIMAT0018959	hsa-mir-4441	1	0
MIMAT0018966	hsa-mir-4447	1	0
MIMAT0018975	hsa-mir-4453	1	0
MIMAT0018980	hsa-mir-4458	1	0
MIMAT0018981	hsa-mir-4459	1	0
MIMAT0018988	hsa-mir-4464	1	0
MIMAT0018995	hsa-mir-4468	1	0
MIMAT0018997	hsa-mir-4470	1	0
MIMAT0018999	hsa-mir-4472	1	0
MIMAT0019017	hsa-mir-4483	1	0
MIMAT0019020	hsa-mir-4486	1	0
MIMAT0019022	hsa-mir-4488	1	0
MIMAT0019023	hsa-mir-4489	1	0
MIMAT0019036	hsa-mir-4500	1	0
MIMAT0019039	hsa-mir-4503	1	0
MIMAT0019064	hsa-mir-4525	1	0
MIMAT0019066	hsa-mir-4527	1	0
MIMAT0019067	hsa-mir-4528	1	0
MIMAT0019072	hsa-mir-4533	1	0
MIMAT0019073	hsa-mir-4534	1	0
MIMAT0019079	hsa-mir-548an	1	0
MIMAT0019081	hsa-mir-4538	1	0
MIMAT0019198	hsa-mir-3120-5p	1	0
MIMAT0019199	hsa-mir-3121-5p	1	0
MIMAT0019209	hsa-mir-3156-3p	1	0
MIMAT0019214	hsa-mir-3173-5p	1	0
MIMAT0019218	hsa-mir-3194-3p	1	0
MIMAT0019220	hsa-mir-3664-3p	1	0
MIMAT0019224	hsa-mir-3691-3p	1	0
MIMAT0019232	hsa-mir-4423-5p	1	0
MIMAT0019233	hsa-mir-4446-5p	1	0
MIMAT0019234	hsa-mir-4474-5p	1	0
MIMAT0019337	hsa-mir-3960	1	0
MIMAT0019358	hsa-mir-3973	1	0
MIMAT0019360	hsa-mir-3975	1	0
MIMAT0019363	hsa-mir-3978	1	0
MIMAT0019695	hsa-mir-4638-5p	1	0
MIMAT0019699	hsa-mir-4640-5p	1	0
MIMAT0019704	hsa-mir-4644	1	0
MIMAT0019708	hsa-mir-4646-3p	1	0
MIMAT0019711	hsa-mir-4649-5p	1	0
MIMAT0019719	hsa-mir-4653-3p	1	0
MIMAT0019721	hsa-mir-4655-5p	1	0
MIMAT0019727	hsa-mir-4659a-3p	1	0
MIMAT0019734	hsa-mir-4659b-3p	1	0
MIMAT0019739	hsa-mir-4665-5p	1	0
MIMAT0019745	hsa-mir-4668-5p	1	0
MIMAT0019746	hsa-mir-4668-3p	1	0
MIMAT0019748	hsa-mir-219b-3p	1	0
MIMAT0019751	hsa-mir-4670-3p	1	0
MIMAT0019756	hsa-mir-4674	1	0
MIMAT0019759	hsa-mir-4676-3p	1	0
MIMAT0019762	hsa-mir-4678	1	0
MIMAT0019764	hsa-mir-4680-5p	1	0
MIMAT0019765	hsa-mir-4680-3p	1	0
MIMAT0019766	hsa-mir-4681	1	0
MIMAT0019771	hsa-mir-4685-5p	1	0
MIMAT0019777	hsa-mir-4688	1	0
MIMAT0019778	hsa-mir-4689	1	0
MIMAT0019784	hsa-mir-4693-5p	1	0
MIMAT0019788	hsa-mir-4695-5p	1	0
MIMAT0019790	hsa-mir-4696	1	0
MIMAT0019791	hsa-mir-4697-5p	1	0
MIMAT0019802	hsa-mir-4703-3p	1	0
MIMAT0019809	hsa-mir-4708-5p	1	0
MIMAT0019811	hsa-mir-4709-5p	1	0
MIMAT0019814	hsa-mir-203b-3p	1	0
MIMAT0019817	hsa-mir-4711-3p	1	0
MIMAT0019826	hsa-mir-4716-5p	1	0
MIMAT0019827	hsa-mir-4716-3p	1	0
MIMAT0019838	hsa-mir-4723-5p	1	0
MIMAT0019840	hsa-mir-451b	1	0
MIMAT0019845	hsa-mir-4726-5p	1	0
MIMAT0019847	hsa-mir-4727-5p	1	0
MIMAT0019851	hsa-mir-4729	1	0
MIMAT0019858	hsa-mir-4733-3p	1	0
MIMAT0019882	hsa-mir-4747-5p	1	0
MIMAT0019884	hsa-mir-4748	1	0
MIMAT0019892	hsa-mir-371b-5p	1	0
MIMAT0019895	hsa-mir-4755-5p	1	0
MIMAT0019896	hsa-mir-4755-3p	1	0
MIMAT0019901	hsa-mir-4757-5p	1	0
MIMAT0019902	hsa-mir-4757-3p	1	0
MIMAT0019905	hsa-mir-4759	1	0
MIMAT0019917	hsa-mir-4766-5p	1	0
MIMAT0019920	hsa-mir-4768-5p	1	0
MIMAT0019923	hsa-mir-4769-3p	1	0
MIMAT0019924	hsa-mir-4770	1	0
MIMAT0019933	hsa-mir-4776-3p	1	0
MIMAT0019942	hsa-mir-4781-5p	1	0
MIMAT0019943	hsa-mir-4781-3p	1	0
MIMAT0019946	hsa-mir-4783-5p	1	0
MIMAT0019948	hsa-mir-4784	1	0
MIMAT0019952	hsa-mir-2467-5p	1	0
MIMAT0019959	hsa-mir-4789-5p	1	0
MIMAT0019960	hsa-mir-4789-3p	1	0
MIMAT0019965	hsa-mir-4793-5p	1	0
MIMAT0019966	hsa-mir-4793-3p	1	0
MIMAT0019967	hsa-mir-4794	1	0
MIMAT0019971	hsa-mir-4796-3p	1	0
MIMAT0019972	hsa-mir-4797-5p	1	0
MIMAT0019982	hsa-mir-4802-3p	1	0
MIMAT0020601	hsa-mir-1273f	1	0
MIMAT0020925	hsa-mir-550a-3-5p	1	0
MIMAT0021023	hsa-mir-5002-5p	1	0
MIMAT0021027	hsa-mir-5004-5p	1	0
MIMAT0021033	hsa-mir-5006-5p	1	0
MIMAT0021034	hsa-mir-5006-3p	1	0
MIMAT0021038	hsa-mir-548ap-3p	1	0
MIMAT0021040	hsa-mir-5008-3p	1	0
MIMAT0021042	hsa-mir-5009-3p	1	0
MIMAT0021043	hsa-mir-5010-5p	1	0
MIMAT0021044	hsa-mir-5010-3p	1	0
MIMAT0021045	hsa-mir-5011-5p	1	0
MIMAT0021128	hsa-mir-5196-5p	1	0
MIMAT0021129	hsa-mir-5196-3p	1	0
MIMAT0022274	hsa-mir-5580-3p	1	0
MIMAT0022276	hsa-mir-5581-3p	1	0
MIMAT0022278	hsa-mir-548at-3p	1	0
MIMAT0022286	hsa-mir-5585-3p	1	0
MIMAT0022288	hsa-mir-5586-3p	1	0
MIMAT0022303	hsa-mir-548av-5p	1	0
MIMAT0022483	hsa-mir-5691	1	0
MIMAT0022485	hsa-mir-4666b	1	0
MIMAT0022489	hsa-mir-5696	1	0
MIMAT0022695	hsa-mir-212-5p	1	0
MIMAT0022697	hsa-mir-382-3p	1	0
MIMAT0022700	hsa-mir-450a-1-3p	1	0
MIMAT0022711	hsa-mir-660-3p	1	0
MIMAT0022712	hsa-mir-1271-3p	1	0
MIMAT0022714	hsa-mir-766-5p	1	0
MIMAT0022717	hsa-mir-873-3p	1	0
MIMAT0022719	hsa-mir-1285-5p	1	0
MIMAT0022724	hsa-mir-1277-5p	1	0
MIMAT0022728	hsa-mir-513c-3p	1	0
MIMAT0022730	hsa-mir-548t-3p	1	0
MIMAT0022737	hsa-mir-550b-2-5p	1	0
MIMAT0022742	hsa-mir-1273g-3p	1	0
MIMAT0022844	hsa-mir-216a-3p	1	0
MIMAT0022938	hsa-mir-937-5p	1	0
MIMAT0022946	hsa-mir-1237-5p	1	0
MIMAT0022965	hsa-mir-3606-3p	1	0
MIMAT0022966	hsa-mir-3617-3p	1	0
MIMAT0022984	hsa-mir-5089-3p	1	0
MIMAT0023697	hsa-mir-6072	1	0
MIMAT0023706	hsa-mir-6081	1	0
MIMAT0023708	hsa-mir-6083	1	0
MIMAT0023713	hsa-mir-6088	1	0
MIMAT0023714	hsa-mir-6089	1	0
MIMAT0024616	hsa-mir-6132	1	0
MIMAT0024618	hsa-mir-6134	1	0
MIMAT0025450	hsa-mir-6499-5p	1	0
MIMAT0025453	hsa-mir-548ay-3p	1	0
MIMAT0025458	hsa-mir-6501-5p	1	0
MIMAT0025462	hsa-mir-6503-5p	1	0
MIMAT0025463	hsa-mir-6503-3p	1	0
MIMAT0025470	hsa-mir-6507-5p	1	0
MIMAT0025473	hsa-mir-6508-3p	1	0
MIMAT0025476	hsa-mir-6510-5p	1	0
MIMAT0025477	hsa-mir-6510-3p	1	0
MIMAT0025482	hsa-mir-6513-5p	1	0
MIMAT0025483	hsa-mir-6513-3p	1	0
MIMAT0025484	hsa-mir-6514-5p	1	0
MIMAT0025841	hsa-mir-6715a-3p	1	0
MIMAT0025843	hsa-mir-6715b-3p	1	0
MIMAT0025858	hsa-mir-892c-3p	1	0
MIMAT0026475	hsa-mir-210-5p	1	0
MIMAT0026479	hsa-mir-152-5p	1	0
MIMAT0026482	hsa-mir-190a-3p	1	0
MIMAT0026483	hsa-mir-370-5p	1	0
MIMAT0026484	hsa-mir-372-5p	1	0
MIMAT0026485	hsa-mir-383-3p	1	0
MIMAT0026609	hsa-mir-520f-5p	1	0
MIMAT0026619	hsa-mir-597-3p	1	0
MIMAT0026622	hsa-mir-619-5p	1	0
MIMAT0026624	hsa-mir-651-3p	1	0
MIMAT0026641	hsa-mir-1298-3p	1	0
MIMAT0026720	hsa-mir-887-5p	1	0
MIMAT0026734	hsa-mir-942-3p	1	0
MIMAT0026749	hsa-mir-513b-3p	1	0
MIMAT0027088	hsa-mir-5189-3p	1	0
MIMAT0027359	hsa-mir-6729-5p	1	0
MIMAT0027367	hsa-mir-6733-5p	1	0
MIMAT0027370	hsa-mir-6734-3p	1	0
MIMAT0027372	hsa-mir-6735-3p	1	0
MIMAT0027376	hsa-mir-6737-3p	1	0
MIMAT0027379	hsa-mir-6739-5p	1	0
MIMAT0027387	hsa-mir-6743-5p	1	0
MIMAT0027390	hsa-mir-6744-3p	1	0
MIMAT0027391	hsa-mir-6745	1	0
MIMAT0027392	hsa-mir-6746-5p	1	0
MIMAT0027396	hsa-mir-6748-5p	1	0
MIMAT0027398	hsa-mir-6749-5p	1	0
MIMAT0027404	hsa-mir-6752-5p	1	0
MIMAT0027405	hsa-mir-6752-3p	1	0
MIMAT0027408	hsa-mir-6754-5p	1	0
MIMAT0027416	hsa-mir-6758-5p	1	0
MIMAT0027428	hsa-mir-6764-5p	1	0
MIMAT0027431	hsa-mir-6765-3p	1	0
MIMAT0027438	hsa-mir-6769a-5p	1	0
MIMAT0027445	hsa-mir-6772-3p	1	0
MIMAT0027461	hsa-mir-6780a-3p	1	0
MIMAT0027463	hsa-mir-6781-3p	1	0
MIMAT0027468	hsa-mir-6784-5p	1	0
MIMAT0027476	hsa-mir-6788-5p	1	0
MIMAT0027479	hsa-mir-6789-3p	1	0
MIMAT0027481	hsa-mir-6790-3p	1	0
MIMAT0027482	hsa-mir-6791-5p	1	0
MIMAT0027483	hsa-mir-6791-3p	1	0
MIMAT0027488	hsa-mir-6794-5p	1	0
MIMAT0027490	hsa-mir-6795-5p	1	0
MIMAT0027498	hsa-mir-6799-5p	1	0
MIMAT0027499	hsa-mir-6799-3p	1	0
MIMAT0027508	hsa-mir-6804-5p	1	0
MIMAT0027511	hsa-mir-6805-3p	1	0
MIMAT0027518	hsa-mir-6809-5p	1	0
MIMAT0027519	hsa-mir-6809-3p	1	0
MIMAT0027527	hsa-mir-6813-3p	1	0
MIMAT0027533	hsa-mir-6816-3p	1	0
MIMAT0027534	hsa-mir-6817-5p	1	0
MIMAT0027535	hsa-mir-6817-3p	1	0
MIMAT0027539	hsa-mir-6819-3p	1	0
MIMAT0027543	hsa-mir-6821-3p	1	0
MIMAT0027556	hsa-mir-6828-5p	1	0
MIMAT0027559	hsa-mir-6829-3p	1	0
MIMAT0027565	hsa-mir-6832-3p	1	0
MIMAT0027567	hsa-mir-6833-3p	1	0
MIMAT0027570	hsa-mir-6835-5p	1	0
MIMAT0027574	hsa-mir-6836-5p	1	0
MIMAT0027575	hsa-mir-6836-3p	1	0
MIMAT0027576	hsa-mir-6837-5p	1	0
MIMAT0027578	hsa-mir-6838-5p	1	0
MIMAT0027585	hsa-mir-6841-3p	1	0
MIMAT0027586	hsa-mir-6842-5p	1	0
MIMAT0027591	hsa-mir-6845-3p	1	0
MIMAT0027604	hsa-mir-6852-5p	1	0
MIMAT0027609	hsa-mir-6854-3p	1	0
MIMAT0027612	hsa-mir-6856-5p	1	0
MIMAT0027616	hsa-mir-6858-5p	1	0
MIMAT0027620	hsa-mir-6769b-5p	1	0
MIMAT0027629	hsa-mir-6864-3p	1	0
MIMAT0027640	hsa-mir-6870-5p	1	0
MIMAT0027645	hsa-mir-6872-3p	1	0
MIMAT0027646	hsa-mir-6873-5p	1	0
MIMAT0027647	hsa-mir-6873-3p	1	0
MIMAT0027654	hsa-mir-6877-5p	1	0
MIMAT0027655	hsa-mir-6877-3p	1	0
MIMAT0027657	hsa-mir-6878-3p	1	0
MIMAT0027663	hsa-mir-6881-3p	1	0
MIMAT0027674	hsa-mir-6887-5p	1	0
MIMAT0027677	hsa-mir-6888-3p	1	0
MIMAT0027679	hsa-mir-6889-3p	1	0
MIMAT0027683	hsa-mir-6891-3p	1	0
MIMAT0027687	hsa-mir-6893-3p	1	0
MIMAT0028115	hsa-mir-7109-5p	1	0
MIMAT0028117	hsa-mir-7110-5p	1	0
MIMAT0028119	hsa-mir-7111-5p	1	0
MIMAT0028219	hsa-mir-7154-3p	1	0
MIMAT0028224	hsa-mir-7157-5p	1	0
MIMAT0028225	hsa-mir-7157-3p	1	0
MIMAT0028227	hsa-mir-7158-3p	1	0
MIMAT0028233	hsa-mir-7161-3p	1	0
MIMAT0028235	hsa-mir-7162-3p	1	0
MIMAT0029310	hsa-mir-7515	1	0
MIMAT0030018	hsa-mir-7703	1	0
MIMAT0030021	hsa-mir-7706	1	0
MIMAT0030419	hsa-mir-7844-5p	1	0
MIMAT0030423	hsa-mir-7848-3p	1	0
MIMAT0030981	hsa-mir-8054	1	0
MIMAT0030991	hsa-mir-8064	1	0
MIMAT0030999	hsa-mir-8072	1	0
MIMAT0031000	hsa-mir-8073	1	0
MIMAT0031002	hsa-mir-8075	1	0
MIMAT0031006	hsa-mir-8079	1	0
MIMAT0031007	hsa-mir-8080	1	0
MIMAT0031008	hsa-mir-8081	1	0
MIMAT0031009	hsa-mir-8082	1	0
MIMAT0031010	hsa-mir-8083	1	0
MIMAT0031177	hsa-mir-7974	1	0
MIMAT0031179	hsa-mir-7976	1	0
MIMAT0031180	hsa-mir-7977	1	0
